# Supplementary material for: Dynamic Modelling under Uncertainty: The Case of Trypanosoma brucei Energy Metabolism
Source: PubMed Central journal article supplement (PMC3269904; doi:10.1371/journal.pcbi.1002352), 2012-01-19

**Distributions of the sampled parameters.** Parameter names followed by a \* are shown log-scaled. The black line is the value used in the fixed-parameter model. List of abbreviations:

| Reactions   |                                                            |
|-------------|------------------------------------------------------------|
| _3PGAT_g    | glycosomal 3-phosphoglycerate transport                    |
| AK_c        | cytosolic adenylate kinase                                 |
| AK_g        | glycosomal adenylate kinase                                |
| ALD_g       | glycosomal aldolase                                        |
| ATP_u_c     | cytosolic ATP utilization                                  |
| ENO_c       | cytosolic enolase                                          |
| G3PDH_g     | glycosomal glycerol 3-phosphate dehydrogenase              |
| GAPDH_g     | glycosomal glyceraldehyde phosphate dehydrogenase          |
| GDA_g       | glycerol 3-phosphate/dihydroxyacetone phosphate antiporter |
| GK_g        | glycosomal glycerol kinase                                 |
| GlcT_c      | cytosolic glucose transport                                |
| GlcT_g      | glycosomal glucose transport                               |
| GPO_c       | cytosolic glycerol 3-phosphate oxidase                     |
| HXK_g       | glycosomal hexokinase                                      |
| PFK_g       | glycosomal phosphofructose kinase                          |
| PGL_g       | glycosomal phosphoglucose isomerase                        |
| PGK_g       | glycosomal phosphoglycerate kinase                         |
| PGAM_c      | cytosolic phosphoglycerate mutase                          |
| PYK_c       | cytosolic pyruvate kinase                                  |
| PyrT_c      | cytosolic pyruvate transport                               |
| TPI_g       | glycosomal triosephosphate isomerase                       |
| Metabolites |                                                            |
| 13BPGA      | 1,3-biphosphoglycerate                                     |
| 2PGA        | 2-phosphoglycerate                                         |
| 3PGA        | 3-phosphoglycerate                                         |
| ADP         | adenosine diphosphate                                      |
| AMP         | adenosine monophosphate                                    |
| ATP         | adenosine triphosphate                                     |
| DHAP        | dihydroxyacetone phosphate                                 |
| Fru16BP     | fructose 1,6-biphosphate                                   |
| Fru6P       | fructose 6-phosphate                                       |
| GA3P        | glyceraldehyde 3-phosphate                                 |
| Glc         | glucose                                                    |
| Glc6P       | glucose 6-phosphate                                        |
| Gly         | glycerol                                                   |
| Gly3P       | glycerol 3-phosphate                                       |
| NAD         | nicotinamide adenine dinucleotide (oxidized form)          |
| NADH        | nicotinamide adenine dinucleotide (reduced form)           |
| PEP         | phosphoenolpyruvate                                        |
| Pyr         | pyruvate                                                   |

Units:

|                                 |                                          |
|---------------------------------|------------------------------------------|
| V <sub>max</sub>                | nmol/min/mg of proteins                  |
| K <sub>m</sub> , K <sub>i</sub> | mmol/l                                   |
| K <sub>eq</sub>                 | no unit except for aldolase: mmol/l      |
| 3PGAT_g_k                       | μl/min/mg of proteins                    |
| AK_c.k1                         | μl <sup>2</sup> /nmol/min/mg of proteins |
| AK_c.k2                         | μl <sup>2</sup> /nmol/min/mg of proteins |
| AK_g.k1                         | μl <sup>2</sup> /nmol/min/mg of proteins |
| AK_g.k2                         | μl <sup>2</sup> /nmol/min/mg of proteins |
| ATP_u_c.k                       | nmol/min/mg of proteins                  |
| GDA_g.k                         | μl <sup>2</sup> /nmol/min/mg of proteins |
| GlcT_g.k                        | μl/min/mg of proteins                    |
| GlcT_c.alpha                    | no unit                                  |
| PYK_c.n                         | no unit                                  |

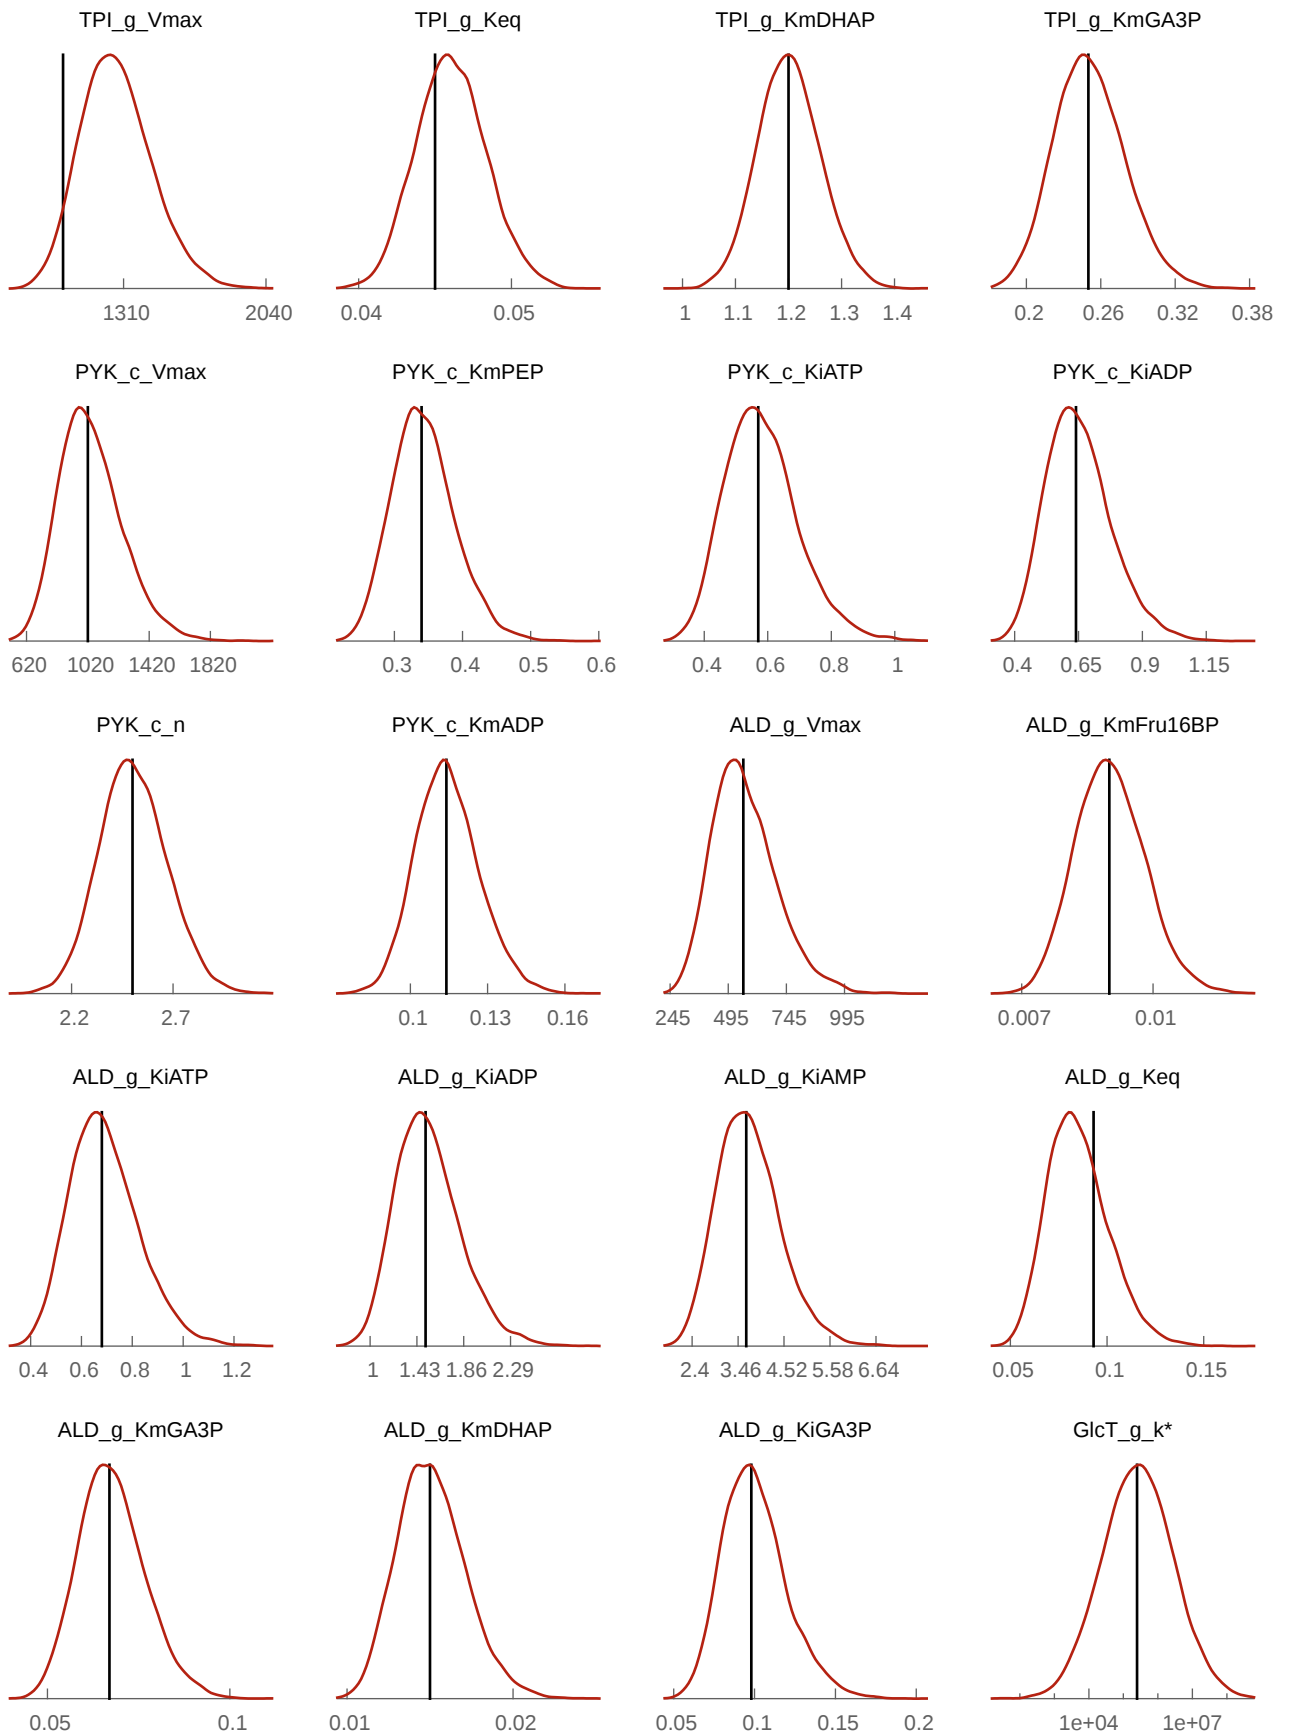

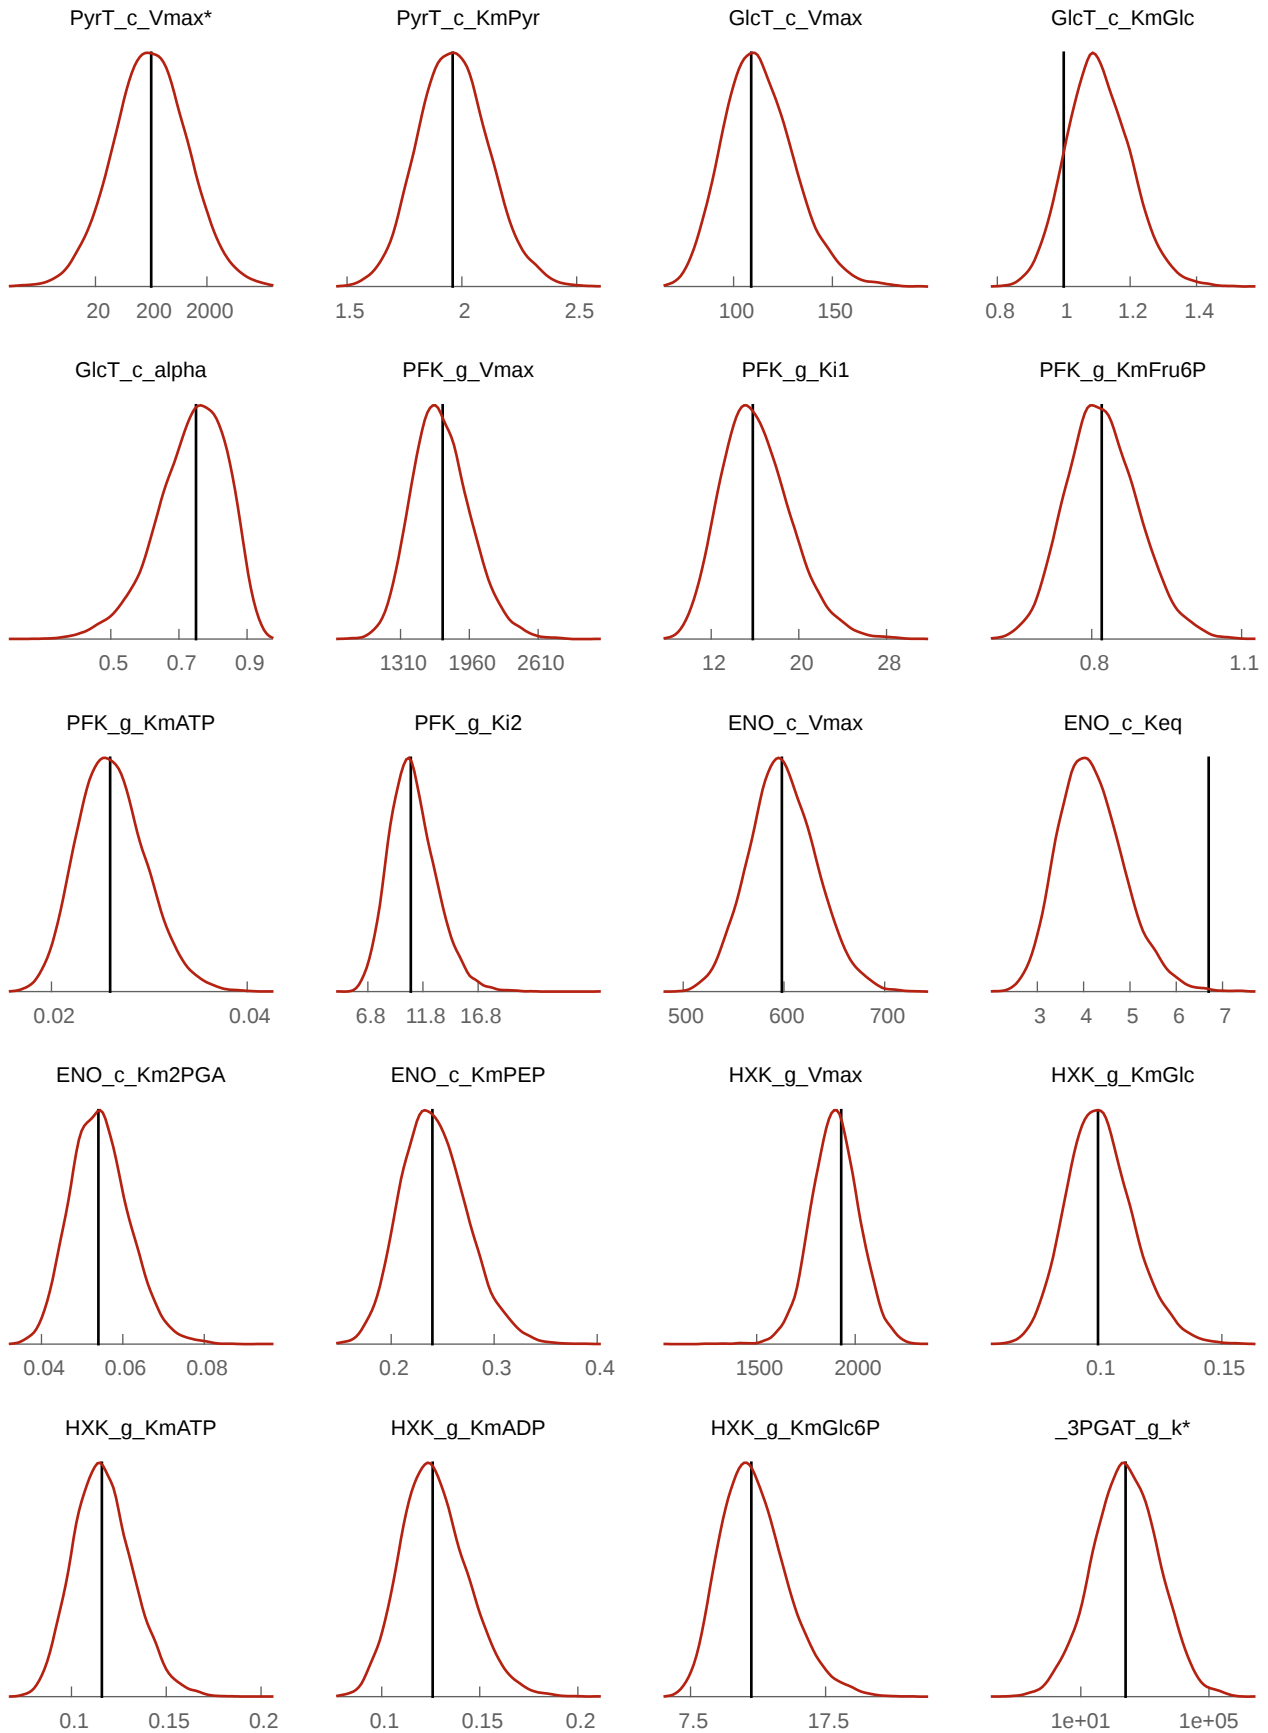

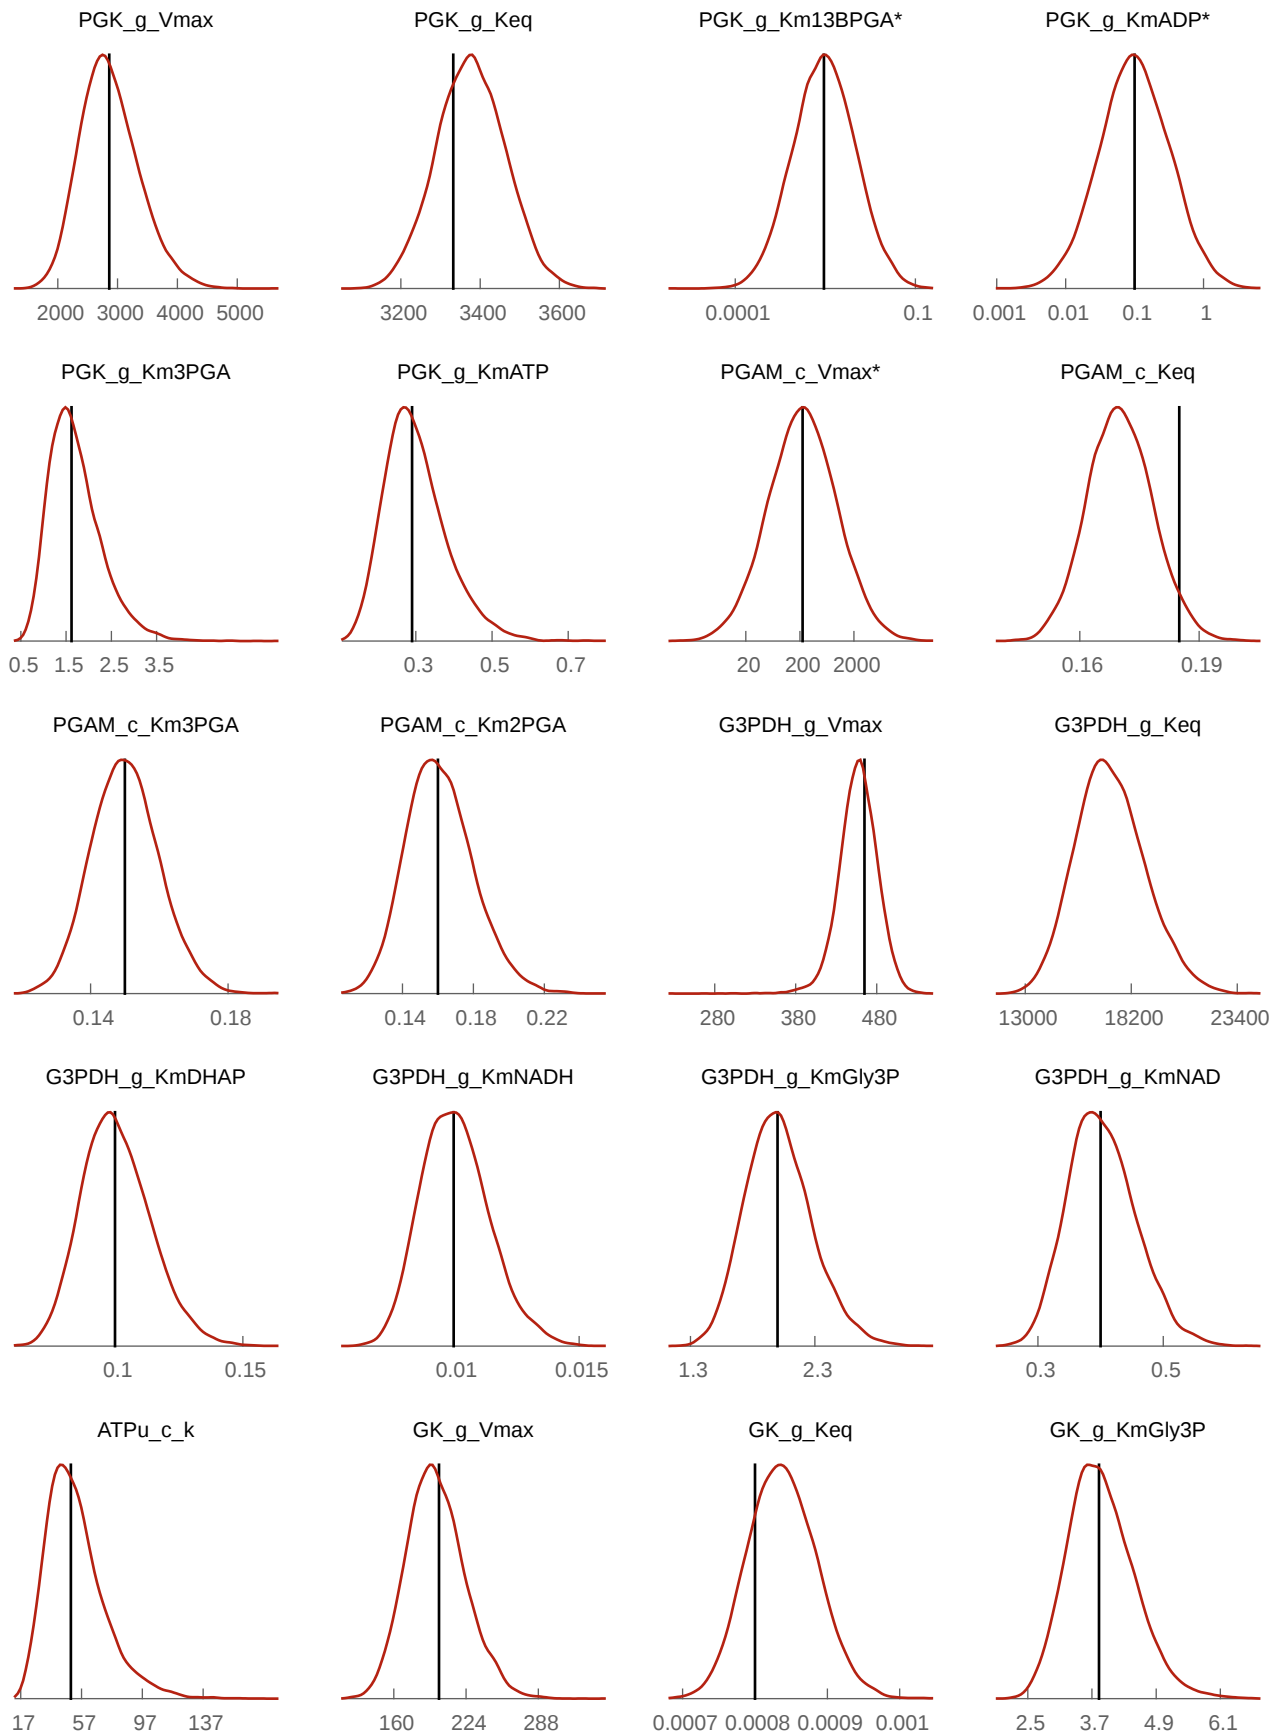

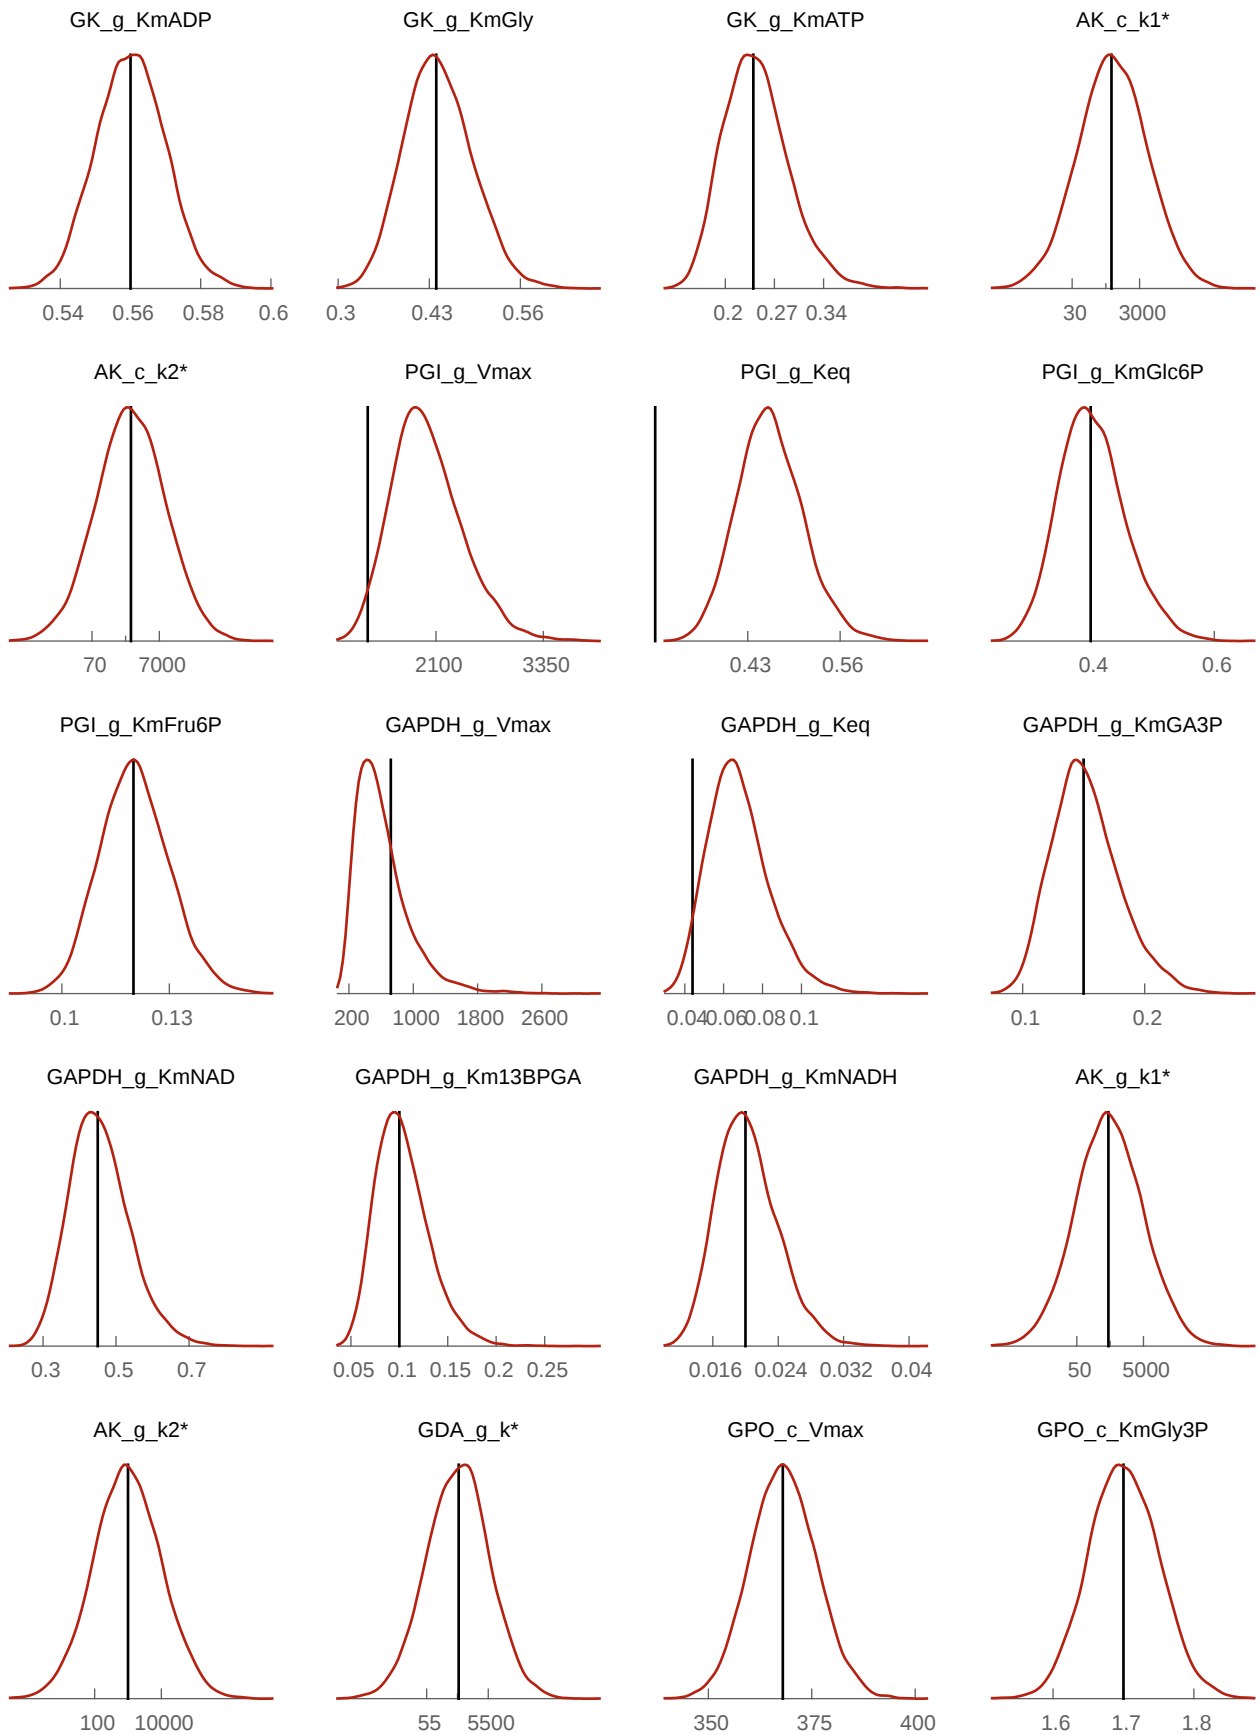

Supplement: pcbi.1002352.s003.pdf [file pcbi.1002352.s003.pdf]
