# Supplementary material for: Dynamic Modelling under Uncertainty: The Case of Trypanosoma brucei Energy Metabolism
Source: PubMed Central journal article supplement (PMC3269904; doi:10.1371/journal.pcbi.1002352), 2012-01-19

**Distributions of the steady-state concentrations of the metabolites in mmol/l.**

Metabolite names followed by a \* are shown log-scaled.

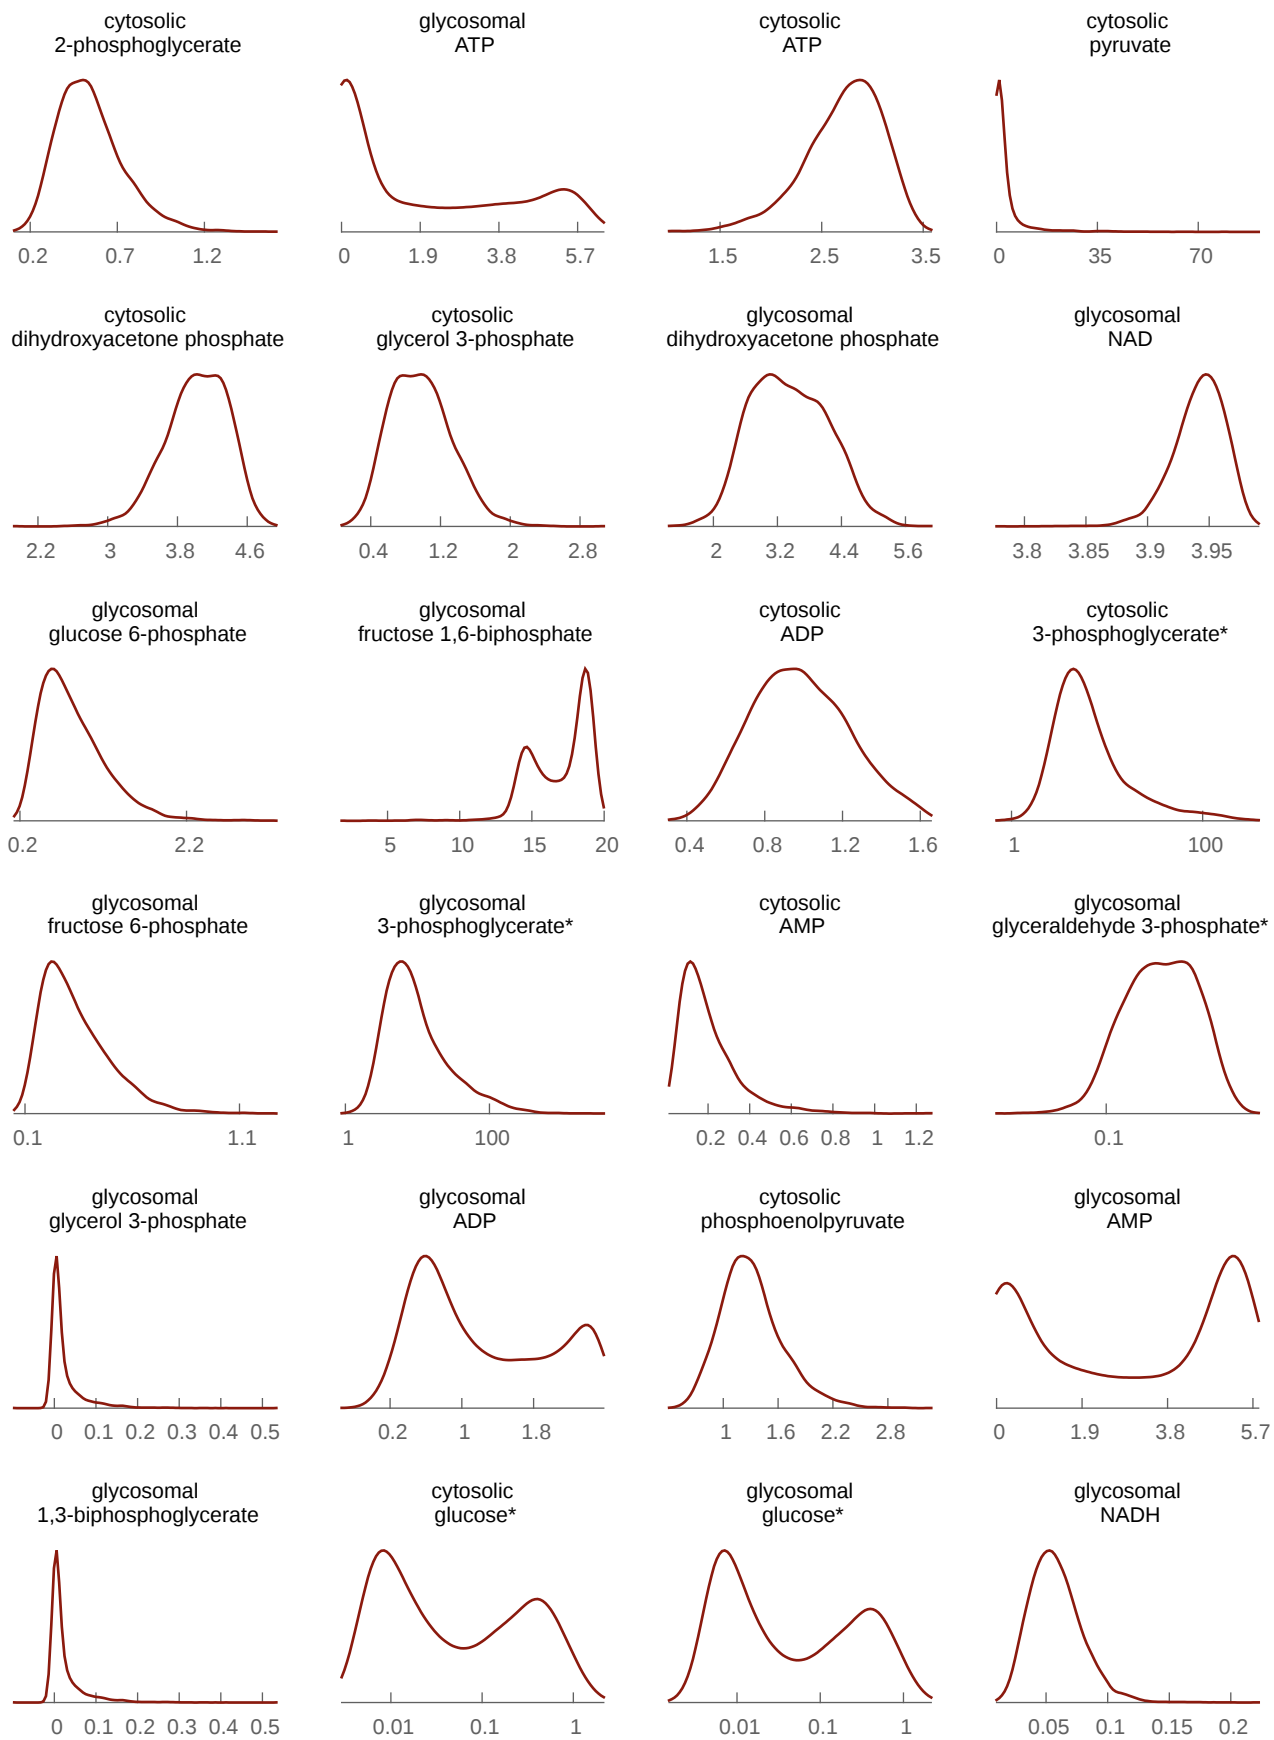

Supplement: pcbi.1002352.s004.pdf [file pcbi.1002352.s004.pdf]
