# Supplementary material for: Dynamic Modelling under Uncertainty: The Case of Trypanosoma brucei Energy Metabolism
Source: PubMed Central journal article supplement (PMC3269904; doi:10.1371/journal.pcbi.1002352), 2012-01-19
Supplement: pcbi.1002352.s005.pdf [file pcbi.1002352.s005.pdf]

| Reaction                                 | Sources                                                                    | Mean    | SEM    |
|------------------------------------------|----------------------------------------------------------------------------|---------|--------|
| Adenylate kinase                         | [1]                                                                        | 0.48    | 0.015  |
| Phosphoglucose isomerase                 | [2, 3]                                                                     | 0.457   | 0.048  |
| Aldolase                                 | [2, 3]                                                                     | 0.084   | 0.017  |
| Triose phosphate isomerase               | [2, 3]                                                                     | 0.046   | 0.0023 |
| Glyceraldehyde-3-phosphate dehydrogenase | [2, 3], NIST(50COR/VEL_252)*                                               | 0.066   | 0.017  |
| Glycerol-3-phosphate dehydrogenase       | NIST(58YOU/PAC_45 <sup>+</sup> ,<br>37EUL/ADL2_42 <sup>+</sup> , 49BAR_43) | 17085   | 1782   |
| Phosphoglycerate kinase                  | [4], NIST(70KRI/BUC_579)                                                   | 3377    | 88     |
| Glycerol kinase                          | [5, 6] <sup>#</sup> , [7]                                                  | 8.37e-4 | 4.8e-5 |
| Phosphoglycerate mutase                  | [2, 3], NIST(49MEY/OES_1388,<br>59CHI/SUG_1391,<br>75GRI/CAR_1396)         | 0.17    | 0.0084 |
| Enolase                                  | [2, 4, 8], NIST(57WOL/BAL_1173)                                            | 4.17    | 0.75   |

**Table 1. Sources used for the calculation of the equilibrium constants mean and standard deviations.** The references retrieve from the NIST Standard Reference Database [9] are specified as NIST(id). SD=standard deviation of the values from all papers (for adenylate kinase the series of values given in [1] is used). \*=values corrected for pH as in [10]. +=values corrected for pH using a series of values at different pH. #=calculated from measured Km and Vmax using the Haldane equation.

## References

1. Atkinson MR, Burton RM, Morton RK (1961) Equilibrium constant of phosphoryl transfer from adenosine triphosphate to galactose in the presence of galactokinase. *Biochem J* 78: 813–820.
2. Voet D, Voet JG, Pratt CW (1999) *Fundamentals of biochemistry*. Wiley.
3. Lehninger AL, Nelson DL, Cox MM (2005) *Principles of biochemistry*, volume 1. Worth.
4. Bergmeyer HU (1974) *Methods of enzymatic analysis*. Verlag Chemie.
5. Kralova I, Rigden DJ, Opperdoes FR, Michels PAM (2000) Glycerol kinase of *Trypanosoma brucei*. cloning, molecular characterization and mutagenesis. *European Journal of Biochemistry* 267: 2323–2333.
6. Janson CA, Cleland WW (1974) The kinetic mechanism of glycerokinase. *Journal of Biological Chemistry* 249: 2562–2566.
7. Burton K (1961) *Biochemists' Handbook*. In: *Biochemists' Handbook*, London: E. & F. N. Spon Ltd. C. long. edition, p. 94.
8. Meyerhof O, Green H (1949) Synthetic action of phosphatase; equilibria of biological esters. *The Journal of Biological Chemistry* 178: 655–667.
9. Goldberg RN, Tewari YB, Bhat TN (2004) Thermodynamics of enzyme-catalyzed reactions – a database for quantitative biochemistry. *Bioinformatics* 20: 2874–2877.
10. Alberty RA (1998) Calculation of standard transformed Gibbs energies and standard transformed enthalpies of biochemical reactants. *Archives of Biochemistry and Biophysics* 353: 116–130.
